# Supplementary material for: Assessment of the Crop Forcing Technique and Irrigation Strategy on the Ripening of Tempranillo Grapes in a Semiarid Climate
Source: Hindawi journal article supplement (doi:10.1155/2023/6278665), 2023-03-07
Supplement: f1 [file 6278665.f1.pdf]

## Supplementary Information

### **Assessment of the crop forcing technique and irrigation strategy on the ripening of Tempranillo grapes in a semi-arid climate.**

Nieves Lavado<sup>a,b</sup>, David Uriarte<sup>a</sup>, Luis A. Mancha<sup>a</sup>, Daniel Moreno<sup>b</sup>, M. Esperanza Valdés<sup>b</sup> y M. Henar Prieto<sup>a</sup>.

<sup>a</sup>CICYTEX (Junta de Extremadura), Finca La Orden, Guadajira, Badajoz, Spain

<sup>b</sup>CICYTEX (Junta de Extremadura), Instituto Tecnológico Agroalimentario de Extremadura, Badajoz, Spain

**Table S1.** Coefficient of determination ( $R^2$ ) and equation between  $x$ =Total Soluble Solids (TSS) and  $y$ = pH; Titratable Acidity (TA); Malic Acid (MAL); Tartaric Acid (TAR); Total Polyphenols (TPP) and Total Anthocyanins (TAN), in year 2017, 2018 and 2019.

| Treatment |       | 2017                    |                    |                | 2018                    |                    |                | 2019                    |                    |                |
|-----------|-------|-------------------------|--------------------|----------------|-------------------------|--------------------|----------------|-------------------------|--------------------|----------------|
|           |       | Equation                | Slope <sup>a</sup> | R <sup>2</sup> | Equation                | Slope <sup>a</sup> | R <sup>2</sup> | Equation                | Slope <sup>a</sup> | R <sup>2</sup> |
| pH        | C-NF  | $y = 0.0944x + 1.552$   | <i>bc</i>          | $R^2 = 0.8252$ | $y = 0.0692x + 1.9309$  | <i>d</i>           | $R^2 = 0.8674$ | $y = 0.0875x + 1.5930$  | <i>a</i>           | $R^2 = 0.8885$ |
|           | RI-NF | $y = 0.1001x + 1.4088$  | <i>b</i>           | $R^2 = 0.8432$ | $y = 0.0939x + 1.6260$  | <i>c</i>           | $R^2 = 0.8284$ | $y = 0.0771x + 1.9269$  | <i>b</i>           | $R^2 = 0.7257$ |
|           | RI-F1 | $y = 0.0909x + 1.6236$  | <i>c</i>           | $R^2 = 0.6995$ | $y = 0.1061x + 1.2605$  | <i>b</i>           | $R^2 = 0.9409$ | $y = 0.0816x + 1.6751$  | <i>ab</i>          | $R^2 = 0.9439$ |
|           | RI-F2 | $y = 0.1237x + 0.7748$  | <i>a</i>           | $R^2 = 0.7143$ | $y = 0.1262x + 0.7096$  | <i>a</i>           | $R^2 = 0.8258$ | $y = 0.0571x + 2.1008$  | <i>c</i>           | $R^2 = 0.904$  |
| TA        | C-NF  | $y = -1.1546x + 32.107$ | <i>b</i>           | $R^2 = 0.8917$ | $y = -1.3285x + 35.061$ | <i>a</i>           | $R^2 = 0.8745$ | $y = -1.0817x + 27.444$ | <i>a</i>           | $R^2 = 0.8048$ |
|           | RI-NF | $y = -1.0622x + 29.257$ | <i>c</i>           | $R^2 = 0.8643$ | $y = -0.6638x + 20.107$ | <i>c</i>           | $R^2 = 0.7199$ | $y = -0.8767x + 24.042$ | <i>c</i>           | $R^2 = 0.8233$ |
|           | RI-F1 | $y = -0.8937x + 25.989$ | <i>d</i>           | $R^2 = 0.6768$ | $y = -1.1065x + 30.534$ | <i>b</i>           | $R^2 = 0.8639$ | $y = -0.9534x + 27.496$ | <i>b</i>           | $R^2 = 0.9024$ |
|           | RI-F2 | $y = -1.2539x + 33.881$ | <i>a</i>           | $R^2 = 0.7079$ | $y = -1.3285x + 35.432$ | <i>a</i>           | $R^2 = 0.8245$ | $y = -0.8464x + 25.411$ | <i>c</i>           | $R^2 = 0.8613$ |
| MAL       | C-NF  | $y = -0.7525x + 20.043$ | <i>a</i>           | $R^2 = 0.8729$ | $y = -1.0193x + 25.71$  | <i>a</i>           | $R^2 = 0.8909$ | $y = -0.7485x + 17.72$  | <i>a</i>           | $R^2 = 0.8927$ |
|           | RI-NF | $y = -0.5372x + 13.757$ | <i>b</i>           | $R^2 = 0.7877$ | $y = -0.3475x + 10.818$ | <i>c</i>           | $R^2 = 0.4712$ | $y = -0.5324x + 14.308$ | <i>bc</i>          | $R^2 = 0.8204$ |
|           | RI-F1 | $y = -0.3503x + 10.702$ | <i>c</i>           | $R^2 = 0.7091$ | $y = -0.4826x + 13.482$ | <i>b</i>           | $R^2 = 0.6438$ | $y = -0.5604x + 16.196$ | <i>b</i>           | $R^2 = 0.9186$ |
|           | RI-F2 | $y = -0.5406x + 15.206$ | <i>b</i>           | $R^2 = 0.7122$ | $y = -0.5579x + 15.536$ | <i>b</i>           | $R^2 = 0.6153$ | $y = -0.5107x + 14.857$ | <i>c</i>           | $R^2 = 0.9033$ |
| TAR       | C-NF  | $y = -0.0853x + 7.4104$ | <i>b</i>           | $R^2 = 0.2917$ | $y = -0.0675x + 6.5076$ | <i>c</i>           | $R^2 = 0.4773$ | $y = -0.0919x + 6.9316$ | <i>a</i>           | $R^2 = 0.4835$ |
|           | RI-NF | $y = -0.1933x + 9.9613$ | <i>a</i>           | $R^2 = 0.696$  | $y = 0.053x + 4.0839$   | -                  | $R^2 = 0.1219$ | $y = -0.0925x + 7.3254$ | <i>a</i>           | $R^2 = 0.452$  |
|           | RI-F1 | $y = -0.0880x + 6.6360$ | -                  | $R^2 = 0.1888$ | $y = -0.0992x + 7.1437$ | <i>b</i>           | $R^2 = 0.2355$ | $y = -0.0804x + 7.1108$ | <i>b</i>           | $R^2 = 0.6687$ |
|           | RI-F2 | $y = -0.1146x + 7.2372$ | <i>b</i>           | $R^2 = 0.3102$ | $y = -0.193x + 8.7879$  | <i>a</i>           | $R^2 = 0.426$  | $y = -0.0993x + 7.6049$ | <i>a</i>           | $R^2 = 0.7237$ |
| TPP       | C-NF  | $y = -0.2889x + 11.891$ | <i>c</i>           | $R^2 = 0.5109$ | $y = -0.3049x + 12.000$ | <i>b</i>           | $R^2 = 0.4868$ | $y = -0.2697x + 10.172$ | <i>b</i>           | $R^2 = 0.5058$ |
|           | RI-NF | $y = -0.3593x + 13.975$ | <i>b</i>           | $R^2 = 0.5387$ | $y = -0.0095x + 5.0595$ | -                  | $R^2 = 0.0006$ | $y = -0.4824x + 15.273$ | <i>a</i>           | $R^2 = 0.7771$ |
|           | RI-F1 | $y = -0.6655x + 21.276$ | <i>a</i>           | $R^2 = 0.729$  | $y = -0.4101x + 16.196$ | <i>b</i>           | $R^2 = 0.2508$ | $y = -0.2761x + 12.141$ | <i>b</i>           | $R^2 = 0.3228$ |
|           | RI-F2 | $y = -0.6569x + 21.474$ | <i>a</i>           | $R^2 = 0.5457$ | $y = -0.565x + 19.097$  | <i>a</i>           | $R^2 = 0.5623$ | $y = -0.3041x + 13.257$ | <i>b</i>           | $R^2 = 0.5401$ |
| TAN       | C-NF  | $y = 0.0783x - 0.8179$  | <i>c</i>           | $R^2 = 0.7069$ | $y = 0.078x - 0.7698$   | <i>c</i>           | $R^2 = 0.9009$ | $y = 0.0695x - 0.6885$  | <i>b</i>           | $R^2 = 0.6641$ |
|           | RI-NF | $y = 0.1190x - 1.4075$  | <i>b</i>           | $R^2 = 0.7901$ | $y = 0.0877x - 0.8398$  | <i>c</i>           | $R^2 = 0.6019$ | $y = 0.0717x - 0.6764$  | <i>b</i>           | $R^2 = 0.4872$ |
|           | RI-F1 | $y = 0.1426x - 2.0128$  | <i>ab</i>          | $R^2 = 0.7432$ | $y = 0.1077x - 1.1079$  | <i>b</i>           | $R^2 = 0.7257$ | $y = 0.1224x - 1.6916$  | <i>a</i>           | $R^2 = 0.9389$ |
|           | RI-F2 | $y = 0.1831x - 2.7493$  | <i>a</i>           | $R^2 = 0.5142$ | $y = 0.1971x - 2.8476$  | <i>a</i>           | $R^2 = 0.5936$ | $y = 0.1168x - 1.3280$  | <i>b</i>           | $R^2 = 0.8426$ |

<sup>a</sup> Comparison of slopes was tested by performing the corresponding analysis of variance (ANOVA), in all cases  $p < 0.001$ . Different letters indicate the existence of statistically significant differences between treatments.

a)

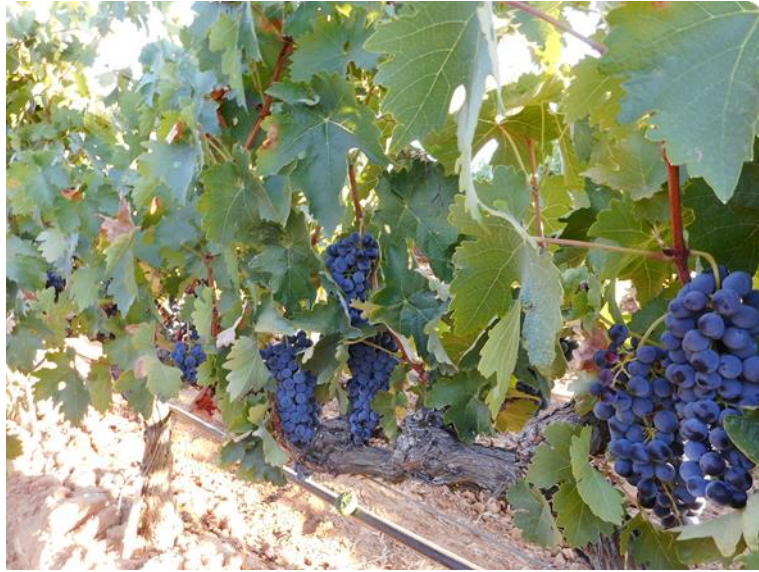

b)

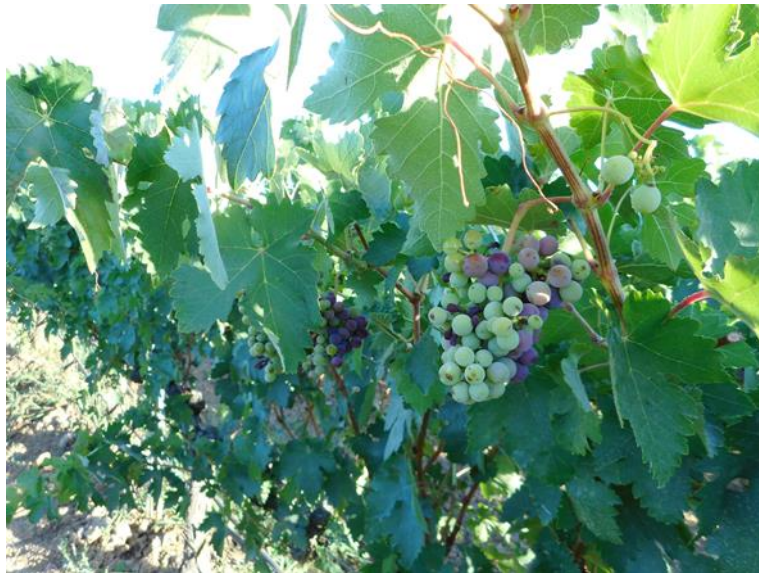

c)

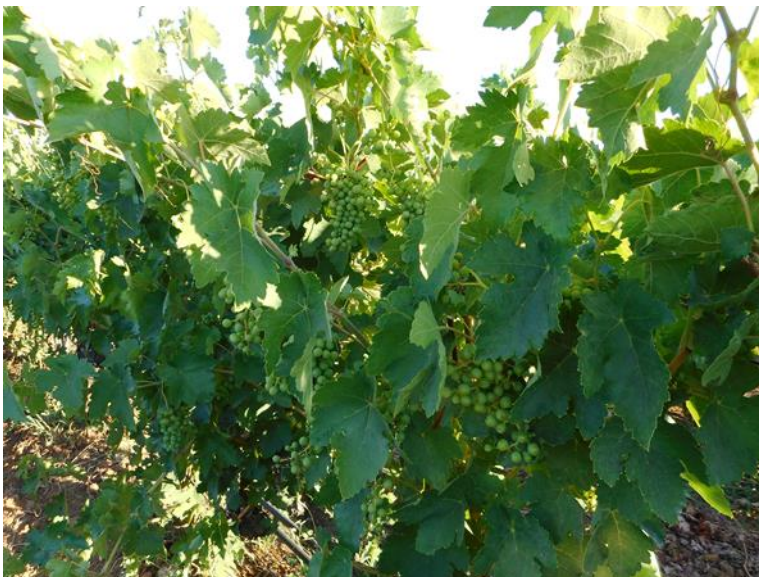

Photographs of vines of treatments (a) C, (b) F1 and (c) F2 on 11th August 2017.
